# Supplementary material for: Antibody modified gold nanoparticles for fast colorimetric screening of rheumatoid arthritis
Source: Royal Society of Chemistry journal article supplement (doi:10.1039/c9an00319c), 2019-01-01
Supplement: c9an00319c1.pdf [file c9an00319c1.pdf]

## Antibody Modified Gold Nanoparticles for Fast Colorimetric screening of Rheumatoid arthritis

Bruno Veigas,<sup>a,b</sup> Ana Matias,<sup>a</sup> Tomás Calmeiro,<sup>b</sup> Elvira Fortunato,<sup>b</sup> Alexandra R. Fernandes<sup>a</sup> and Pedro Viana Baptista\*<sup>a</sup>

### Supplementary Information

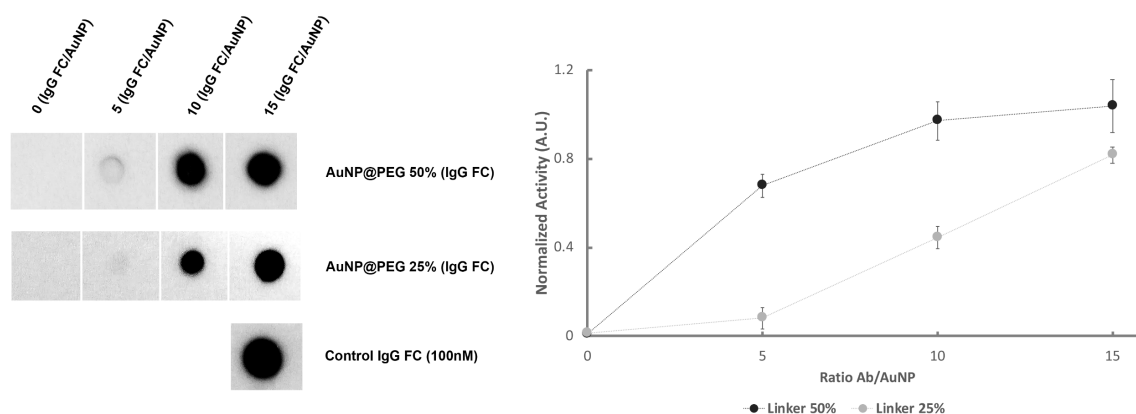

**Figure S1:** Characterization of Au-nanoprobes functionalized with igG-Fc for the detection of IgM RF. Quantification of probe activity was accessed via a dot blot assay. A link between the ratio of IgG-Fc per AuNP and probe activity was found. Also, a higher surface coverage of the Linker (PEG-COOH) allowed for increased probe activity.

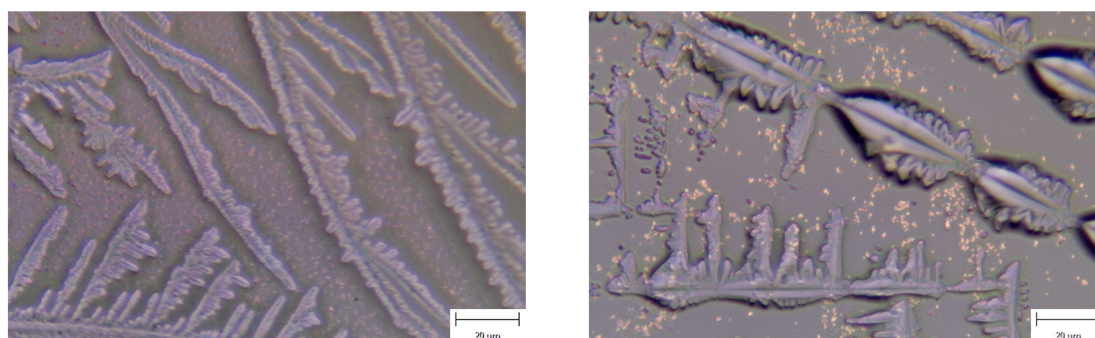

**Figure S2:** Microscope image of Au-nanoprobe with IgM from human plasma (left), and Au-nanoprobe with IgM RF complex (right). Concentration of 500 IU/mL of IgM RF was incubated for a period of 60 minutes before measurement.

---

<sup>a</sup>. UCIBIO, Departamento de Ciências da Vida, Faculdade de Ciências e Tecnologia, Universidade NOVA de Lisboa, Campus de Caparica, 2829-516 Caparica, Portugal; \*Correspondence: [pmvb@fct.unl.pt](mailto:pmvb@fct.unl.pt)

<sup>b</sup>. CENIMAT/i3N, Departamento de Ciência dos Materiais, Faculdade de Ciências e Tecnologia, Universidade NOVA de Lisboa, Campus de Caparica, 2829-516 Caparica, Portugal.

Electronic Supplementary Information (ESI) available: [details of any supplementary information available should be included here]. See DOI: 10.1039/x0xx00000x
